# Supplementary material
Source: PubMed Central journal article supplement (PMC2575668)
Supplement: NIHMS74336-supplement-supplement_1.pdf [file NIHMS74336-supplement-supplement_1.pdf]

**Supplemental (Online) Table 1**

Race/ethnicity stratified prevalences of albuminuria and mean urine albumin excretion by acculturative and socioeconomic characteristics, MESA 2000-2002.

| <b>Prevalence of Albuminuria (%)</b>        |         |         |         |         |         |         |          |         |
|---------------------------------------------|---------|---------|---------|---------|---------|---------|----------|---------|
|                                             | White   |         | Chinese |         | Black   |         | Hispanic |         |
| <i>N</i>                                    | 2,624   |         | 803     |         | 1,895   |         | 1,492    |         |
|                                             | Model 1 | Model 2 | Model 1 | Model 2 | Model 1 | Model 2 | Model 1  | Model 2 |
| <b>Place of birth</b>                       |         |         |         |         |         |         |          |         |
| Other country                               | 6.6     | 5.4     | 14.8    | 11.6    | 12.5    | 10.7    | 13.6     | 10.8    |
| United States                               | 7.6     | 6.0     | 20.0    | 16.7    | 14.4    | 11.6    | 16.0     | 10.5    |
| p-value                                     | 0.60    | 0.71    | 0.47    | 0.45    | 0.52    | 0.77    | 0.29     | 0.88    |
| <b>Generations in U.S. §</b>                |         |         |         |         |         |         |          |         |
| 0                                           | 6.6     | 5.5     | 14.8    | 11.6    | 12.6    | 10.7    | 13.5     | 10.8    |
| 1                                           | 9.1     | 8.1     | 20.0    | 16.7    | 9.8     | 8.8     | 15.2     | 10.0    |
| 2                                           | 6.6     | 5.4     | --      | --      | 11.1    | 9.8     | 20.3     | 14.8    |
| 3                                           | 7.6     | 5.6     | --      | --      | 14.6    | 11.6    | 13.4     | 7.8     |
| p-value†                                    | 0.38    | 0.15    | 0.47    | 0.45    | 0.71    | 0.93    | 0.45     | 0.56    |
| <b>Education</b>                            |         |         |         |         |         |         |          |         |
| < High school degree                        | 13.1    | 9.3     | 20.5    | 15.9    | 14.4    | 11.1    | 15.3     | 10.5    |
| High school degree or some college          | 9.4     | 7.0     | 12.8    | 10.9    | 15.8    | 12.8    | 13.2     | 10.6    |
| College degree                              | 5.8     | 5.0     | 14.2    | 10.7    | 12.2    | 9.8     | 15.7     | 13.1    |
| p-value†                                    | 0.0003  | 0.01    | 0.11    | 0.13    | 0.22    | 0.33    | 0.66     | 0.60    |
| <b>Income</b>                               |         |         |         |         |         |         |          |         |
| <\$20,000                                   | 7.3     | 5.4     | 13.5    | 10.4    | 14.7    | 11.7    | 16.7     | 12.3    |
| \$20,000-\$49,999                           | 6.8     | 5.3     | 16.5    | 13.0    | 13.6    | 9.6     | 15.1     | 10.7    |
| ≥\$50,000                                   | 8.1     | 6.5     | 17.4    | 13.7    | 14.8    | 13.6    | 9.4      | 8.3     |
| p-value†                                    | 0.45    | 0.28    | 0.28    | 0.30    | 0.93    | 0.36    | 0.03     | 0.15    |
| <b>Mean Urine Albumin Excretion* (mg/g)</b> |         |         |         |         |         |         |          |         |
| <b>Place of birth</b>                       |         |         |         |         |         |         |          |         |
| Other country                               | 6.61    | 9.39    | 10.35   | 10.21   | 8.70    | 8.93    | 9.39     | 9.65    |
| United States                               | 6.96    | 11.36   | 9.28    | 9.36    | 8.62    | 8.52    | 11.36    | 10.47   |
| p-value                                     | 0.48    | 0.62    | 0.62    | 0.67    | 0.92    | 0.62    | 0.01     | 0.22    |
| <b>Generations in U.S. §</b>                |         |         |         |         |         |         |          |         |
| 0                                           | 6.61    | 6.65    | 10.35   | 10.21   | 8.71    | 8.93    | 9.38     | 9.64    |
| 1                                           | 7.04    | 7.15    | 9.28    | 9.36    | 6.87    | 7.68    | 11.78    | 10.68   |
| 2                                           | 7.02    | 7.04    | --      | --      | 8.09    | 8.63    | 11.65    | 11.34   |
| 3                                           | 6.90    | 6.70    | --      | --      | 8.67    | 8.54    | 8.94     | 8.10    |
| p-value†                                    | 0.92    | 0.38    | 0.62    | 0.67    | 0.77    | 0.76    | 0.13     | 0.70    |
| <b>Education</b>                            |         |         |         |         |         |         |          |         |
| < High school degree                        | 7.69    | 7.06    | 11.97   | 10.91   | 9.88    | 9.57    | 10.42    | 9.72    |
| High school degree or some college          | 7.46    | 7.12    | 9.94    | 10.25   | 8.65    | 8.53    | 9.54     | 9.89    |
| College degree                              | 6.44    | 6.62    | 9.71    | 9.67    | 8.21    | 8.31    | 10.07    | 10.76   |

|                      |        |      |       |       |      |      |       |       |
|----------------------|--------|------|-------|-------|------|------|-------|-------|
| p-value <sup>†</sup> | 0.0005 | 0.10 | 0.09  | 0.27  | 0.12 | 0.22 | 0.46  | 0.41  |
| Income               |        |      |       |       |      |      |       |       |
| <\$20,000            | 7.33   | 7.11 | 10.21 | 10.22 | 9.26 | 9.15 | 10.97 | 10.65 |
| \$20,000-\$49,999    | 6.95   | 6.81 | 10.40 | 10.03 | 9.07 | 8.46 | 10.03 | 9.78  |
| ≥\$50,000            | 6.86   | 6.83 | 10.37 | 10.26 | 7.83 | 8.34 | 7.95  | 8.66  |
| p-value <sup>†</sup> | 0.38   | 0.66 | 0.89  | 0.98  | 0.05 | 0.31 | 0.004 | 0.03  |

<sup>†</sup> p-value for linear trend across groups

<sup>§</sup> Generation 0 means participant was not born in the U.S.; first generation, 1 or both parents were not born in the U.S.; second generation, both parents were born in the U.S. but  $\geq 2$  grandparents were not born in the U.S.; and third generation, both parents were born in the U.S. and  $\geq 3$  grandparents were born in the U.S.

\* Geometric means reported

-- Non-estimable due to small sample size

Model 1: Each independent variable (place of birth, generations in U.S., education, and income) was considered one at a time, and adjustments were made for age and sex. Model 1 for place of birth and generations in U.S. each additionally included education (6 levels) and income (7 levels). Model 1 for income (3 levels) also included place of birth and education (6 levels), while Model 1 for education (3 levels) additionally included place of birth and income (7 levels).

Model 2: Adjusted for model 1 + LDL cholesterol, HDL cholesterol, statin use, BMI, systolic blood pressure, hypertension medication use, smoking status (current, former, never), diabetes status.
